# Supplementary material
Source: publisher figshare collection journal article supplement (https://frontiersin.figshare.com/ndownloader/files/14893655)
Supplement: Supplementary file [file 14893655]

# Supplementary information

## Dispersion and stabilisation of exfoliated graphene in ionic liquids

Emilie Bordes,<sup>†</sup> Bishoy Morcos,<sup>‡</sup> David Bourgogne,<sup>†</sup> Jean-Michel Andanson,<sup>†</sup>  
Pierre-Olivier Bussière,<sup>†</sup> Catherine C. Santini,<sup>‡</sup> Anass Benayad,<sup>¶</sup> Margarida Costa  
Gomes,<sup>\*,§</sup> and Agílio A.H. Pádua<sup>\*,§</sup>

<sup>†</sup>*Université Clermont Auvergne, CNRS, SIGMA Clermont, Institut de Chimie de  
Clermont-Ferrand, 63000 Clermont-Ferrand, France.*

<sup>‡</sup>*Université de Lyon, UMR 5265 CNRS, 43 bd du 11 Novembre 1918, 69616 Villeurbanne,  
France*

<sup>¶</sup>*Université Grenoble Alpes and CEA, LITEN, France*

<sup>§</sup>*École Normale Supérieure de Lyon, CNRS, Laboratoire de Chimie, 69364 Lyon, France*

E-mail: [margarida.costa-gomes@ens-lyon.fr](mailto:margarida.costa-gomes@ens-lyon.fr); [agilio.padua@ens-lyon.fr](mailto:agilio.padua@ens-lyon.fr)

## Water content in ionic liquids

After ionic liquids (ILs) have been dried under primary vacuum for 24 hours at room temperature, the water content has been quantified by a Karl Fisher coulometer DL32 from Mettler Toledo in a Hydranal solution.

Table S1: Water content in different liquids used to exfoliate the graphite.

| Formula                | Name                                                           | Water content<br>/ppm |
|------------------------|----------------------------------------------------------------|-----------------------|
| $[C_4C_1im][Ntf_2]$    | 1-butyl-3-methylimidazolium bis(trifluoromethylsulfonyl)imide  | 10-180                |
| $[C_{10}C_1im][Ntf_2]$ | 1-decyl-3-methylimidazolium bis(trifluoromethylsulfonyl)imide  | 210                   |
| $[BnzmC_1im][Ntf_2]$   | 1-benzyl-3-methylimidazolium bis(trifluoromethylsulfonyl)imide | 480                   |
| $[Pyrr_{4,1}][Ntf_2]$  | butylmethylpyrrolidinium bis(trifluoromethylsulfonyl)imide     | 20                    |
| $[N_{4,1,1,1}][Ntf_2]$ | butyltrimethylammonium bis(trifluoromethylsulfonyl)imide       | 10                    |
| $[C_4C_1im][C(CN)_3]$  | 1-butyl-3-methylimidazolium tricyanomethanide                  | 50                    |
| $[C_2C_1im][N(CN)_2]$  | 1-ethyl-3-methylimidazolium dicyanamide                        | 270                   |
| $[C_4C_1im][C_1SO_4]$  | 1-butyl-3-methylimidazolium methylsulfate                      | 160                   |
| $[C_2C_1im][Otf]$      | 1-ethyl-3-methylimidazolium triflate                           | 60                    |

## Characterization of natural graphite flakes

Natural flakes graphite were purchased from Alpha Aesar with a 99.8% purity and a size inferior to 325 mesh. Raman spectroscopy and X-ray diffraction (XRD) were performed, without any treatment, to ensure the initial purity.

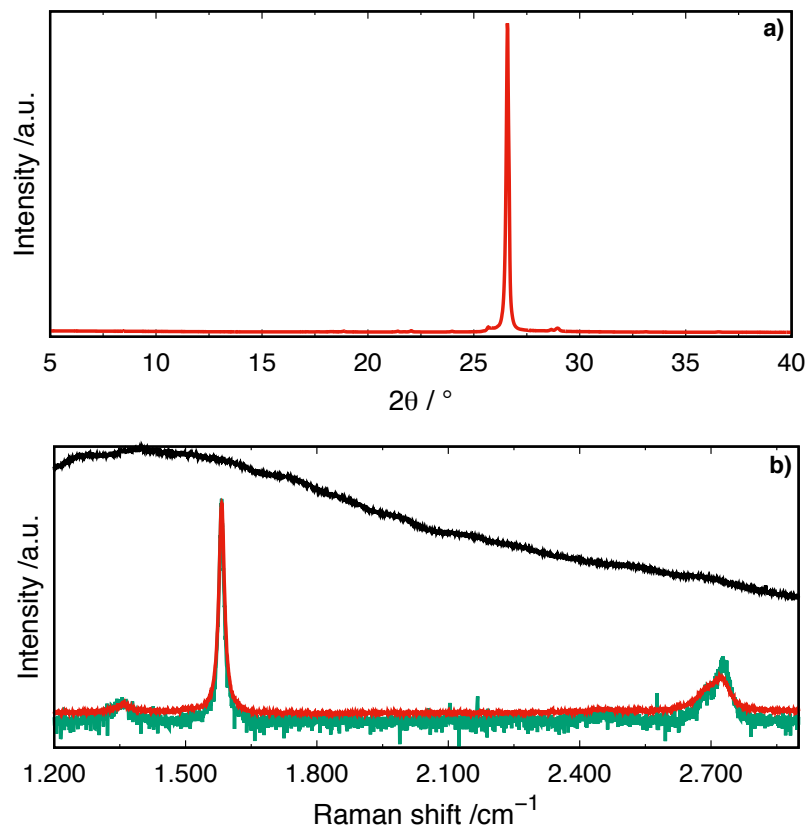

Figure S1: Characterization of graphite flakes from Alfa Aesar without specific conditioning: a) XRD and b) Spectroscopy Raman: graphite flakes (red), graphite flakes on PVDF filter (green) and PVDF filter (black).

## Concentration of SEG in ILs

Table S2: Quantities of suspended exfoliated graphite (SEG) in ILs after centrifugation determined by spectroscopy UV-visble at 660 nm, at 298 K. Size of graphite flakes has been classified after filtration using a PVDF filter with pore size of 220 nm.

| ILs                                                                 | Yield of SEG | Concentration       | Yield of SEG > 220 nm |
|---------------------------------------------------------------------|--------------|---------------------|-----------------------|
| Units                                                               | %            | mg.mL <sup>-1</sup> | %                     |
| [C <sub>4</sub> C <sub>1</sub> im][Ntf <sub>2</sub> ]               | 31.0         | 1.55                | 51.3                  |
| [C <sub>10</sub> C <sub>1</sub> im][Ntf <sub>2</sub> ]              | 20.4         | 1.01                | 52.9                  |
| [BnzmC <sub>1</sub> im][Ntf <sub>2</sub> ]                          | 20.9         | 1.08                | 70.7                  |
| [N <sub>4,1,1,1</sub> ][Ntf <sub>2</sub> ]                          | 25.7         | 1.36                | 84.2                  |
| [Pyrr <sub>4,1</sub> ][Ntf <sub>2</sub> ]                           | 35.0         | 1.73                | 59.4                  |
| [C <sub>2</sub> C <sub>1</sub> im][Otf]                             | 3.4          | 0.18                | 44.3                  |
| [C <sub>4</sub> C <sub>1</sub> im][C <sub>1</sub> SO <sub>4</sub> ] | 9.1          | 0.47                | 85.0                  |
| [C <sub>4</sub> C <sub>1</sub> im][C(CN) <sub>3</sub> ]             | 1.5          | 0.08                | 100.0                 |
| [C <sub>2</sub> C <sub>1</sub> im][N(CN) <sub>2</sub> ]             | 4.3          | 0.22                | 31.6                  |

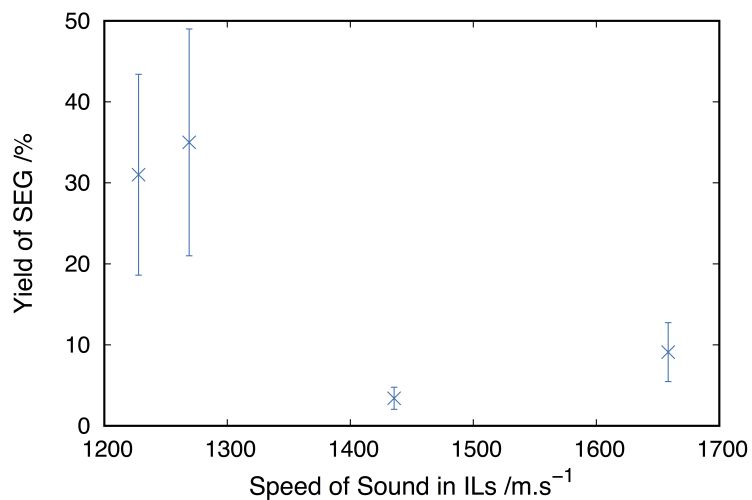

Figure S2: Yield of SEG in ILs as function of the speed of sound in ILs at 298 K.<sup>1</sup>

## Size analysis of SEG in ILs

Table S3: Number of exfoliated graphene flakes analysed by AFM and TEM measurements in the different ILs.

| ILs                                                                 | Number of<br>AFM | analysed flakes<br>TEM | Average of number<br>of layers (AFM) |
|---------------------------------------------------------------------|------------------|------------------------|--------------------------------------|
| [C <sub>4</sub> C <sub>1</sub> im][Ntf <sub>2</sub> ]               | 96               | 27                     | 44.9 ± 38.4                          |
| [C <sub>10</sub> C <sub>1</sub> Im][Ntf <sub>2</sub> ]              | 12               | 13                     |                                      |
| [BnzmC <sub>1</sub> im][Ntf <sub>2</sub> ]                          | 187              | 16                     | 25.3 ± 17.3                          |
| [N <sub>4,1,1,1</sub> ][Ntf <sub>2</sub> ]                          | 57               | 21                     | 41.2 ± 32.1                          |
| [Pyr <sub>4,1</sub> ][Ntf <sub>2</sub> ]                            | 12               | 10                     |                                      |
| [C <sub>2</sub> C <sub>1</sub> im][Otf]                             | 51               | 10                     | 11.5 ± 7.7                           |
| [C <sub>4</sub> C <sub>1</sub> im][C <sub>1</sub> SO <sub>4</sub> ] | 104              | 15                     | 19.7 ± 9.8                           |
| [C <sub>4</sub> C <sub>1</sub> im][C(CN) <sub>3</sub> ]             | 94               | 3                      | 38.8 ± 18.5                          |
| [C <sub>2</sub> C <sub>1</sub> im][N(CN) <sub>2</sub> ]             | 13               | 8                      |                                      |

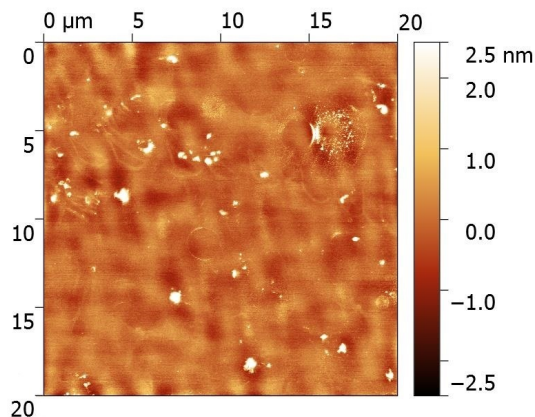

Figure S3: Topographical AFM image of flakes produced in IL and deposited on Si/SiO<sub>2</sub> substrates by spin-coating.

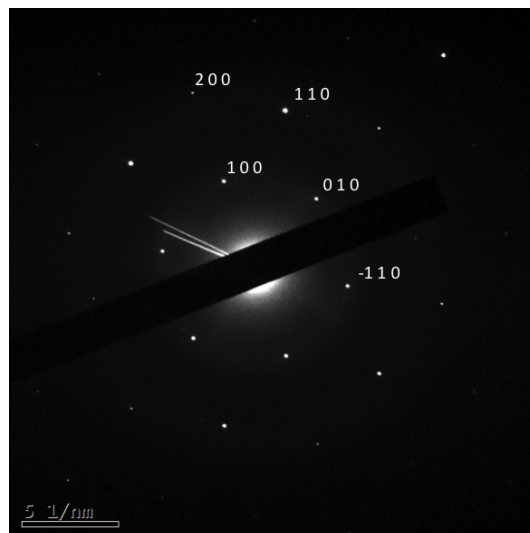

Figure S4: Electron diffraction pattern of graphene generated by exfoliation of graphite by sonication in [BnzmC<sub>1</sub>im][Ntf<sub>2</sub>].

## XPS

The pristine graphite was fitting with an asymmetric peak centered at 284.5 eV and a plasmonic peak at 6.1 eV from the main peak relative to  $\pi - \pi^*$  interaction. Spectrum is presented in Fig. S6.

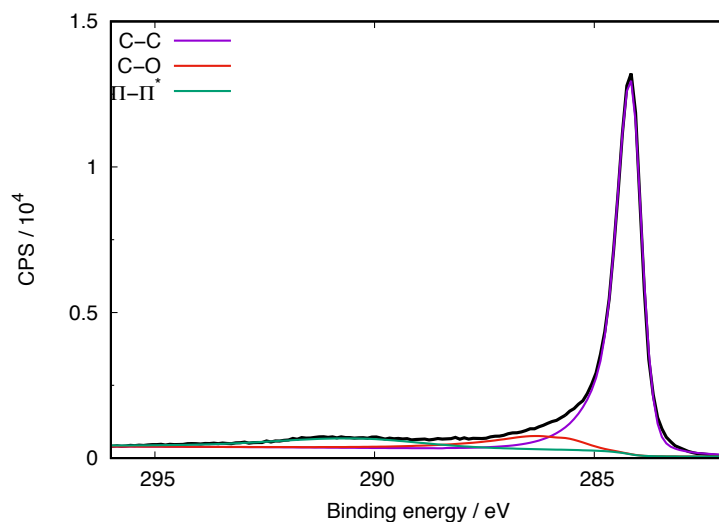

Figure S5: XPS spectrum, expressed in counts per second (CPS), measured at graphite surface. The deconvoluted carbon peak is presented.

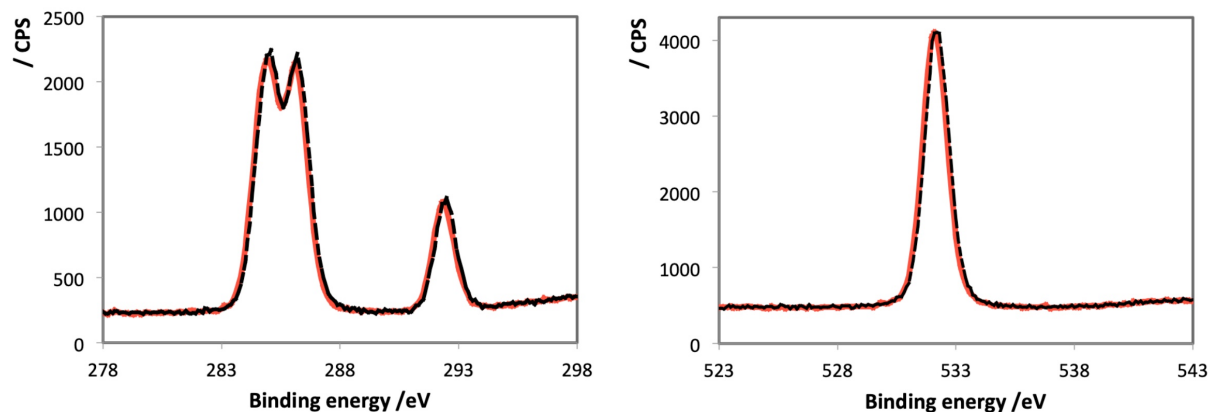

Figure S6: High resolution XPS spectrum, expressed in counts per second (CPS), measured on [Pyrr<sub>4,1</sub>][Ntf<sub>2</sub>] before (black dashed line) and after (red line) sonication for 24h at 423 K. The peaks presented are for C (left) and O (right).

## References

- (1) Sattari, M.; Gharagheizi, F.; Ilani-Kashkouli, P.; Mohammadi, A. H.; Ramjugernath, D. Determination of the speed of sound in ionic liquids using a least squares support vector machine group contribution method. *Fluid Phase Equilib.* **2014**, *367*, 188–193.
